# Supplementary material for: Differential expression of major histocompatibility complex class I in subtypes of breast cancer is associated with estrogen receptor and interferon signaling
Source: PubMed Central journal article supplement (PMC5058668; doi:10.18632/oncotarget.8798), 2016-04-18
Supplement: oncotarget-07-30119-s001.pdf [file oncotarget-07-30119-s001.pdf]

# Differential expression of major histocompatibility complex class I in subtypes of breast cancer is associated with estrogen receptor and interferon signaling

## Supplementary Material

### Patients and tissue specimens

The first series included 688 consecutive breast cancer patients who underwent surgery for primary breast cancer between 1993 and 1998 at Asan Medical Center, Seoul, Korea. This series had formalin-fixed, paraffin-embedded, tissue samples for analysis. Six cycles of adjuvant methotrexate-based regimen (cyclophosphamide 500 mg/m<sup>2</sup>, methotrexate 40 mg/m<sup>2</sup>, and 5-fluorouracil 500 mg/m<sup>2</sup>) or anthracycline-based regimen (cyclophosphamide 500 mg/m<sup>2</sup>, adriamycin 50 mg/m<sup>2</sup>, and 5-fluorouracil 500 mg/m<sup>2</sup>) were administered in 435 patients out of the 688 patients in the consecutive breast cancer cohort. Fourteen patients received adjuvant chemotherapy with unknown regimens. Radiotherapy and hormone therapy was performed in 26.6% and 73.4% of patients, respectively. The median follow-up duration was 15.9 years.

The validation TNBC cohort consisted of 769 TNBC patients who underwent surgery for primary breast cancer between 2004 and 2010 at Asan Medical Center, Seoul, Korea. This cohort of patients had formalin-fixed, paraffin-embedded, tissue samples for analysis. Of the 769 patients in the validation TNBC cohort, 518 were treated with four cycles of adjuvant anthracycline and cyclophosphamide (AC; adriamycin 60 mg/m<sup>2</sup> and cyclophosphamide 600 mg/m<sup>2</sup>). The remaining 250 patients were treated with either four cycles of AC followed by four cycles of paclitaxel (175 mg/m<sup>2</sup>) or four cycles of AC followed by four cycles of docetaxel (75 mg/m<sup>2</sup>). Most patients treated with AC (95.9%) had no lymph node metastasis, whereas most patients treated with AC and taxane (98.4%) had lymph node metastasis. Radiotherapy was performed in 78.5% of patients. None of the patients received hormone therapy. The median follow-up duration was 6.4 years.

**Supplementary Table S1.** Comparison of pathologic factors in the validation TNBC cohort according to HLA-ABC expression in tumor cells

| Variables                               | HLA-ABC expression |                 |                   | <i>P</i> |
|-----------------------------------------|--------------------|-----------------|-------------------|----------|
|                                         | Negative           | Weakly positive | Strongly positive |          |
| Histology                               |                    |                 |                   | <0.001   |
| Invasive carcinoma of no special type   | 134 (76.6)         | 101 (75.4)      | 367 (82.5)        |          |
| Adenoid cystic carcinoma                | 3 (1.7)            | 1 (0.7)         | 0 (0.0)           |          |
| Carcinoma with apocrine differentiation | 12 (6.9)           | 7 (5.2)         | 8 (1.8)           |          |
| Carcinoma with medullary features       | 0 (0.0)            | 0 (0.0)         | 20 (4.5)          |          |
| Invasive micropapillary carcinoma       | 7 (4.0)            | 6 (4.5)         | 11 (2.5)          |          |
| Mucinous carcinoma                      | 1 (0.6)            | 0 (0.0)         | 0 (0.0)           |          |
| Metaplastic carcinoma                   | 14 (8.0)           | 19 (14.2)       | 39 (8.8)          |          |
| Invasive lobular carcinoma              | 4 (2.3)            | 0 (0.0)         | 0 (0.0)           |          |
| Histologic grade                        |                    |                 |                   | <0.001   |
| 1                                       | 0 (0.0)            | 0 (0.0)         | 1 (0.2)           |          |
| 2                                       | 69 (39.4)          | 39 (29.1)       | 83 (18.7)         |          |
| 3                                       | 106 (60.6)         | 95 (70.9)       | 361 (81.1)        |          |
| pT                                      |                    |                 |                   | 0.264    |
| 1                                       | 68 (38.9)          | 63 (47.0)       | 192 (43.1)        |          |
| 2                                       | 97 (55.4)          | 68 (50.7)       | 239 (53.7)        |          |
| 3                                       | 10 (5.7)           | 2 (1.5)         | 14 (3.1)          |          |
| 4                                       | 0 (0.0)            | 1 (0.7)         | 0 (0.0)           |          |
| Lymphovascular invasion                 |                    |                 |                   | 0.145    |
| Negative                                | 124 (71.3)         | 105 (78.4)      | 340 (77.4)        |          |
| Positive                                | 50 (28.7)          | 29 (21.6)       | 99 (22.6)         |          |
| Lymph node metastasis                   |                    |                 |                   | 0.147    |
| Negative                                | 101 (57.7)         | 98 (73.1)       | 293 (65.8)        |          |
| Positive                                | 74 (42.3)          | 36 (26.9)       | 152 (34.2)        |          |
| Radiation therapy                       |                    |                 |                   | 0.002    |
| Negative                                | 54 (30.9)          | 23 (17.2)       | 82 (18.4)         |          |
| Positive                                | 121 (69.1)         | 111 (82.8)      | 363 (81.6)        |          |
| Adjuvant systemic therapy               |                    |                 |                   | 0.103    |
| Negative                                | 0 (0.0)            | 0 (0.0)         | 1 (0.2)           |          |
| AC                                      | 107 (61.1)         | 101 (75.4)      | 300 (67.4)        |          |
| ACT                                     | 68 (38.9)          | 33 (24.6)       | 144 (32.4)        |          |
| Basal type                              |                    |                 |                   | <0.001   |
| Negative                                | 85 (48.6)          | 49 (36.6)       | 138 (31.0)        |          |
| Positive                                | 90 (51.4)          | 85 (63.4)       | 307 (69.0)        |          |
| Tumor-infiltrating lymphocytes          |                    |                 |                   | <0.001   |
| ≤10%                                    | 74 (42.3)          | 46 (34.3)       | 61 (13.7)         |          |
| 20%–30%                                 | 43 (24.6)          | 39 (29.1)       | 87 (19.6)         |          |
| 40%–60%                                 | 34 (19.4)          | 19 (14.2)       | 105 (23.6)        |          |
| >60%                                    | 24 (13.7)          | 30 (22.4)       | 192 (43.1)        |          |
| HLA-ABC intensity in stromal cells      |                    |                 |                   | <0.001   |
| 1                                       | 11 (6.4)           | 1 (0.7)         | 1 (0.2)           |          |
| 2                                       | 96 (55.5)          | 67 (50.0)       | 89 (20.0)         |          |
| 3                                       | 66 (38.1)          | 66 (49.3)       | 355 (79.8)        |          |

AC, anthracycline and cyclophosphamide; ACT, anthracycline, cyclophosphamide, and taxane.

**Supplementary Table S2.** Survival analyses of clinicopathologic variables that affect clinical outcomes in the validation TNBC cohort

| Variables                                                       | Univariate   |             |                | Multivariate |             |                |
|-----------------------------------------------------------------|--------------|-------------|----------------|--------------|-------------|----------------|
|                                                                 | Hazard ratio | 95% CI      | <i>P</i> value | Hazard ratio | 95% CI      | <i>P</i> value |
| Age: ≥50 years vs. <50                                          | 0.855        | 0.595–1.228 | 0.396          | 0.796        | 0.557-1.138 | 0.211          |
| Histologic grade: 3 vs. 1/2                                     | 0.756        | 0.518–1.102 | 0.146          | 1.001        | 0.680-1.472 | 0.997          |
| pT: 3/4 vs. 1/2                                                 | 2.876        | 1.549–5.339 | 0.001          | 1.764        | 0.911-3.413 | 0.092          |
| Lymph node metastasis:<br>positive vs. negative                 | 2.543        | 1.789–3.614 | <0.001         | 2.413        | 1.696-3.433 | <0.001         |
| TILs (per 10%)                                                  | 0.982        | 0.975-0.989 | <0.001         | 0.980        | 0.973-0.988 | <0.001         |
| HLA-ABC expression:<br>strongly/weakly positive<br>vs. negative | 0.670        | 0.458–0.981 | 0.038          | 0.971        | 0.657-1.435 | 0.882          |

CI, confidence interval; TIL, tumor infiltrating lymphocyte.

**Supplementary Table S3.** List of antibodies used in this study

| Antibody          | Dilution | Source                              |
|-------------------|----------|-------------------------------------|
| ER                | 1:200    | Leica Biosystems, Newcastle, UK     |
| PR                | 1:200    | Leica Biosystems                    |
| HER2              | 1:8      | Ventana Medical Systems, Tucson, AZ |
| EGFR pharmDx      | none     | DAKO, Glostrup, Denmark             |
| CK5/6             | 1:200    | DAKO                                |
| CK5               | 1:200    | Leica Biosystems                    |
| HLA-ABC [EMR 8-5] | 1:1600   | Abcam, Cambridge, UK                |
| CD8               | 1:200    | DAKO                                |
| CD69              | 1:5      | Abcam                               |

**Supplementary Table S4.** Description of the five analysis sets in terms the specific evaluations performed for each set of data

|                                  | Estrogen receptor           | MHC I                                                      | Tumor-infiltrating lymphocyte                                         | Interferon signaling pathway                                                               | Mutation analysis             |
|----------------------------------|-----------------------------|------------------------------------------------------------|-----------------------------------------------------------------------|--------------------------------------------------------------------------------------------|-------------------------------|
| Consecutive breast cancer cohort | ER IHC                      | HLA-ABC IHC                                                | H&E                                                                   | —                                                                                          | —                             |
| Validation TNBC cohort           | ER IHC                      | HLA-ABC IHC                                                | H&E, CD3 & CD8 IHC                                                    | —                                                                                          | —                             |
| Normal luminal cells             | ER IHC                      | HLA-ABC IHC                                                | —                                                                     | —                                                                                          | —                             |
| TCGA data                        | <i>ESR1</i> gene expression | <i>HLA-A</i> , <i>HLA-B</i> , <i>HLA-C</i> gene expression | <i>CD3D</i> , <i>CD3E</i> , <i>CD3G</i> , <i>CD8B</i> gene expression | <i>MX1</i> , <i>IFNAR1</i> , <i>IFNAR2</i> , <i>IFNGR1</i> , <i>IFNGR2</i> gene expression | Numbers and types of mutation |
| CCLC data                        | <i>ESR1</i> gene expression | <i>HLA-A</i> , <i>HLA-B</i> , <i>HLA-C</i> gene expression | —                                                                     | <i>MX1</i> , <i>IFNAR1</i> , <i>IFNAR2</i> , <i>IFNGR1</i> , <i>IFNGR2</i> gene expression | —                             |

CCLC, Cancer Cell Line Encyclopedia; H&E, hematoxylin and eosin staining; IHC, immunohistochemistry; TCGA, The Cancer Genome Atlas; TNBC, triple-negative breast cancer.

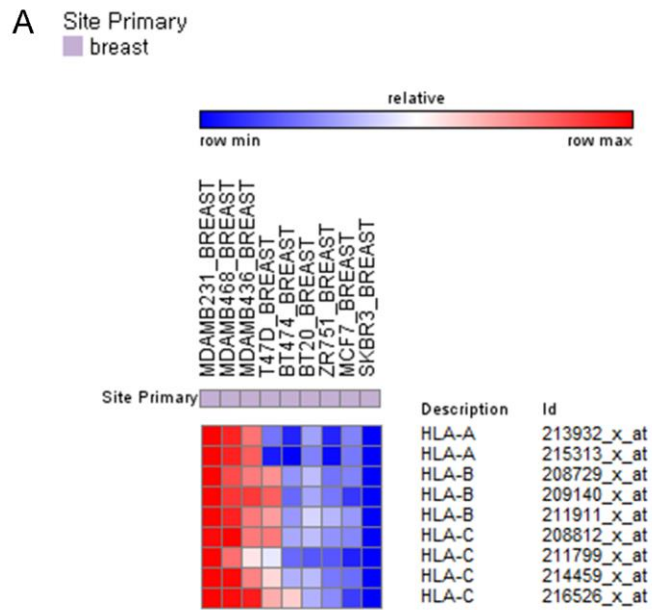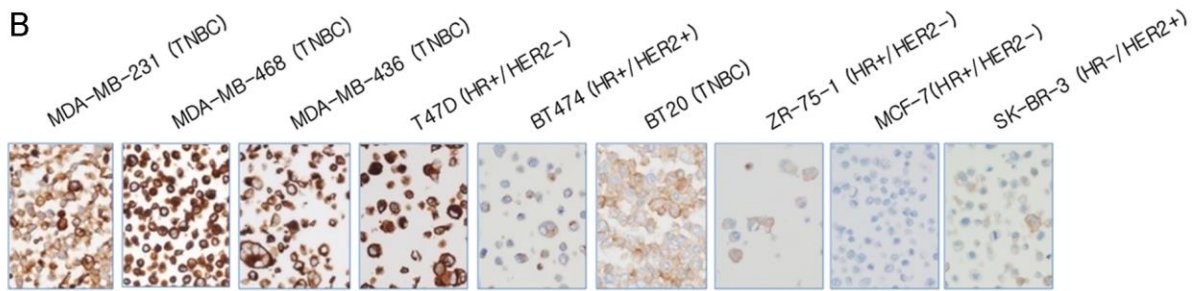

**Supplementary Figure S1.** HLA genes (A) and HLA-ABC protein expression (B) of breast cancer cell lines.
